# Supplementary material for: Entry of Francisella tularensis into Murine B Cells: The Role of B Cell Receptors and Complement Receptors
Source: PubMed Central journal article supplement (PMC4498600; doi:10.1371/journal.pone.0132571), 2015-07-10
Supplement: pone.0132571.s001.pdf [file pone.0132571.s001.pdf]

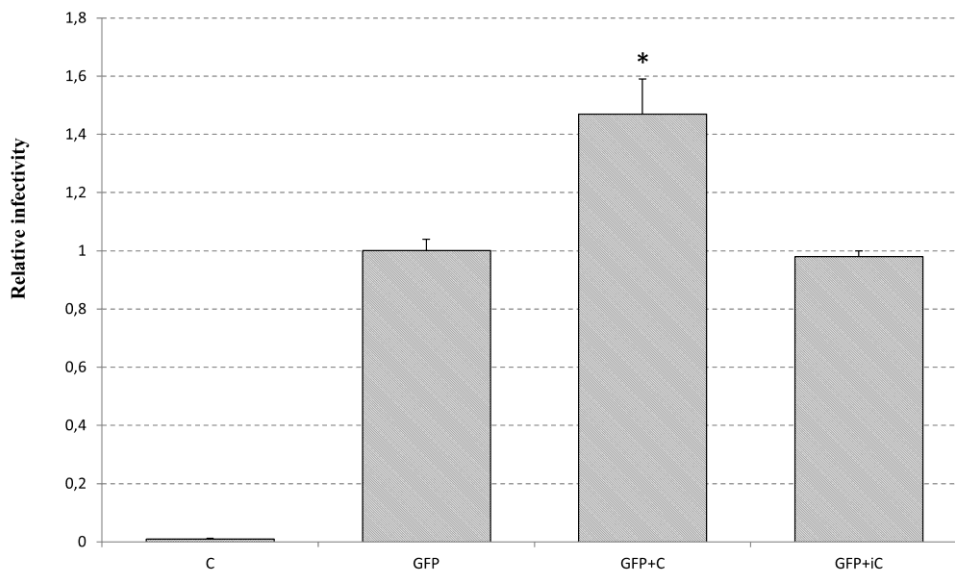

**S2 Fig. Relative infectivity of *F. tularensis* LVS opsonized with fresh murine sera (C) and inactivated fresh murine sera (iC).** The volume of 500  $\mu$ L of fresh murine sera (C) or 500  $\mu$ L of murine heat-inactivated fresh sera (iC) as a control were added to  $4 \times 10^9$  bacteria, incubated at 36.8°C for 1 h, washed twice with pre-warmed PBS, resuspended in 1 mL saline, and used for the experiments. To opsonized bacteria the sera were added to 1 mL of bacterial suspension. A20 cells ( $5 \times 10^5$  per well) were co-cultivated with unopsonized, opsonized with C, and iC resp. *F. tularensis* LVS/GFP in total volume of 0.5 mL per well at MOI 500. Control A20 cells were cultivated without infection. After 3 h incubation cultures were washed using PBS at 36.8°C and 5% CO<sub>2</sub> atmosphere. The proportion of infected cells with *F. tularensis* LVS/GFP was examined using flow cytometry. Error bars indicate SD around the means of samples processed in triplicate. Relative infectivity was calculated as a ratio among A20 cells infected with *F. tularensis* LVS/GFP and A20 cells infected with opsonized bacteria. Proportional number of infected A20 cells with GFP was laid to be one. Two-tailed

*t*-test was used to find significant difference between GFP and GFP+C and, GFP+iC (\*  $P < 0.05$ ). Results shown from one experiment are representative of three independent experiments.

Note: Heat-inactivated sera were prepared by heating sera in water bath (56°C) at the volume of 0.5 mL for 30 min.
