# Supplementary material for: Entry of Francisella tularensis into Murine B Cells: The Role of B Cell Receptors and Complement Receptors
Source: PubMed Central journal article supplement (PMC4498600; doi:10.1371/journal.pone.0132571), 2015-07-10
Supplement: pone.0132571.s002.pdf [file pone.0132571.s002.pdf]

**S1 Table. Viability of bacteria inside the B cells.**

| Mouse No. | Number of cells <sup>1</sup> | Number of CFU <sup>2</sup> |
|-----------|------------------------------|----------------------------|
| 1         | 2.3 x 10 <sup>4</sup>        | 1.05 x 10 <sup>2</sup>     |
| 2         | 4.1 x 10 <sup>4</sup>        | 1.62 x 10 <sup>2</sup>     |
| 3         | 4.8 x 10 <sup>4</sup>        | 2.13 x 10 <sup>2</sup>     |

BALB/c mice were infected with *F. tularensis* LVS/GFP. After 24 h peritoneal cells were collected, resuspended in DMEM cultivation medium supplemented with 2% fetal bovine serum and then incubated with the antibody CD19-Alexa Fluor 647. Peritoneal CD19<sup>+</sup> cells were sorted using BD FACSAria II Cell Sorter. Sorted CD19<sup>+</sup> cells were washed using PBS and lysed by 0.1% sodium deoxycholate after washing. Actual numbers of bacteria were determined by serial dilutions (10<sup>0</sup> and 10<sup>-2</sup>) and the number of CFU was calculated.

<sup>1</sup> Number of CD19<sup>+</sup> cells seeded onto McLeod plates in volume 50  $\mu$ L and cultivated at 36.8°C.

<sup>2</sup> The number of CFU was determined after 48-72 h of cultivation.
